# Supplementary material for: Surface acoustic wave-based generation and transfer of droplets onto wettable substrates
Source: Royal Society of Chemistry journal article supplement (doi:10.1039/d2ra04089a), 2022-01-01
Supplement: d2ra04089a1.pdf [file d2ra04089a1.pdf]

## SUPPLEMENTARY

### Surface acoustic wave-based generation and transfer of droplets onto wettable substrates

Krishnadas Narayanan Nampoothiri<sup>1,2</sup>, Niladri Sekhar Satpathi<sup>1</sup> and Ashis Kumar Sen<sup>1,3\*</sup>

<sup>1</sup>Fluid Systems Laboratory, Department of Mechanical Engineering, Indian Institute of Technology Madras, Chennai-600036, India.

<sup>2</sup>Current Affiliation: Department of Mechanical Engineering, Amrita School of Engineering, Amrita Vishwa Vidyapeetham, Chennai-601103, India

<sup>3</sup>Micro Nano Bio Fluidics Group, Indian Institute of Technology Madras, Chennai-600036, India.

\*Corresponding Author: ashis@iitm.ac.in

#### Thermal Images:

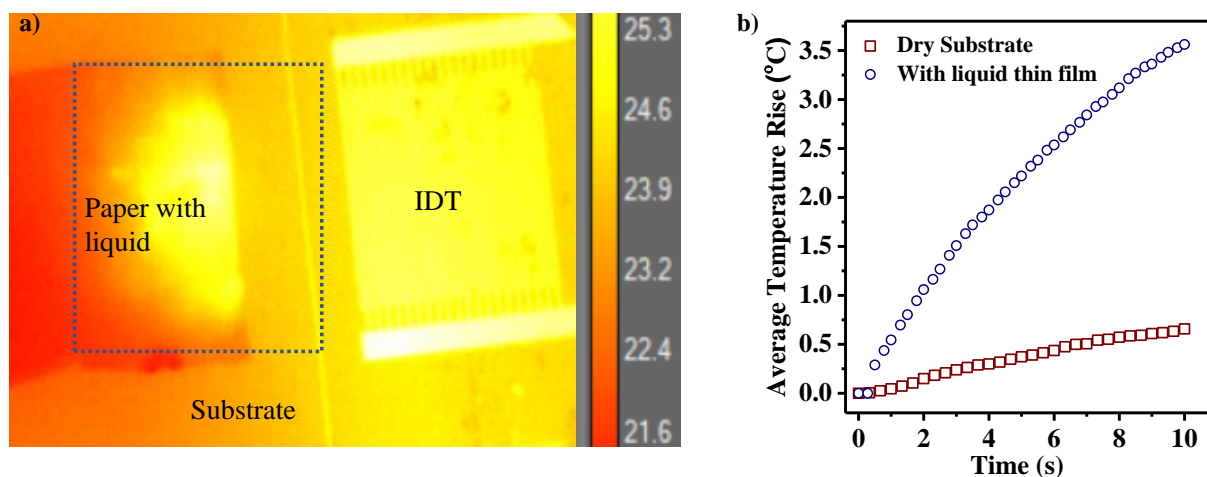

**Fig. S1** (a) Thermal IR image of the substrate during SAW actuation at time  $t = 10$  s. The temperature values in the thermal palette is in °C (b) Average temperature rise of the substrates (dry and wet) when SAW is actuated for 10 s.

### Experimental images of the droplets on surfaces having different WCAs:

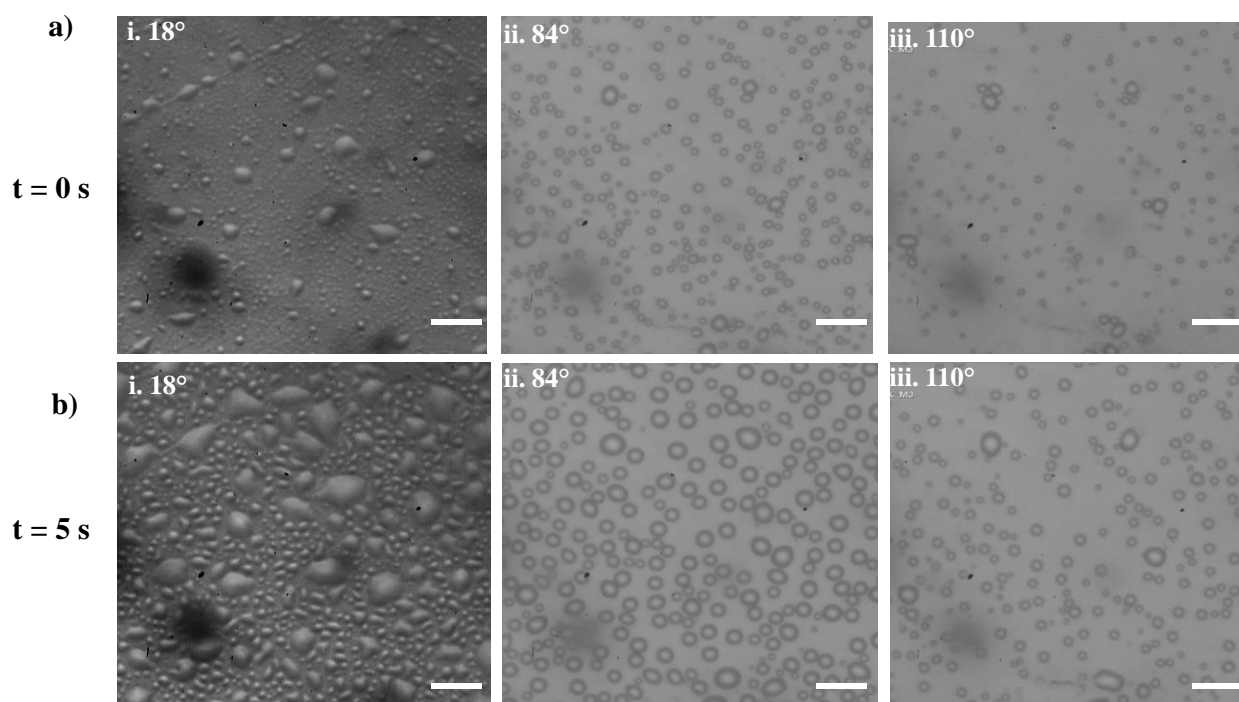

**Fig. S2** (a) Experimental images of the droplets on surfaces having different WCA at  $t = 0$  s: (a-i)  $18^\circ$ , (a-ii)  $84^\circ$ , (a-iii)  $110^\circ$ . (b) Experimental images of the droplets on surfaces having different WCA at  $t = 5$  s: (b-i)  $18^\circ$ , (b-ii)  $84^\circ$ , (b-iii)  $110^\circ$ . Scale bar =  $10 \mu\text{m}$ .

### Droplet size distributions:

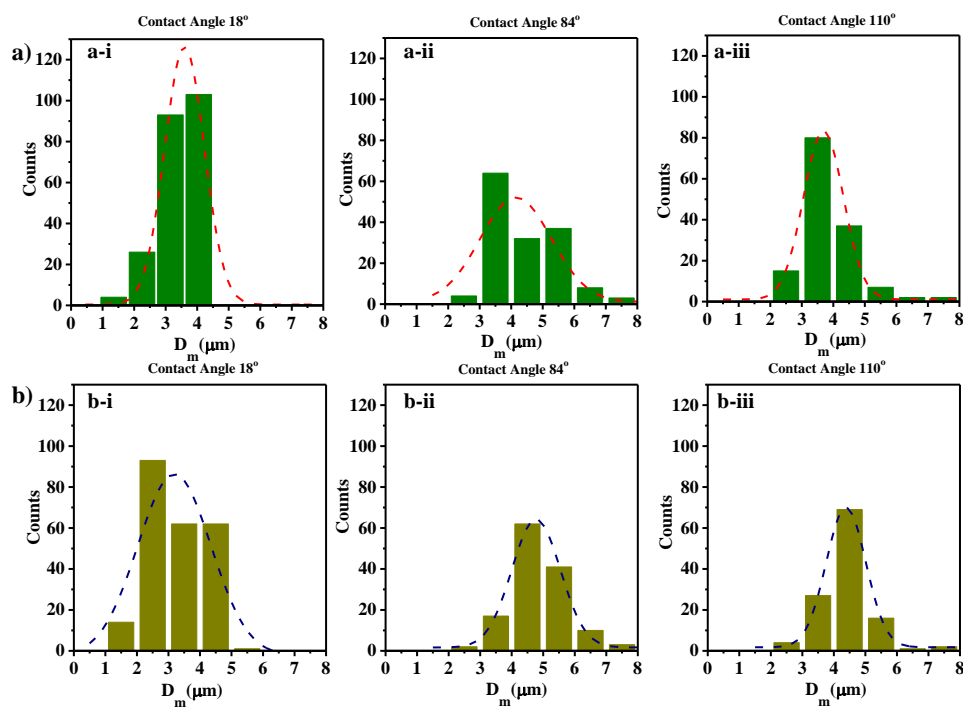

**Fig. S3** Droplet size distributions at (a)  $t = 0$  s and (b)  $t = 5$  s on surfaces having different WCA (a-i and b-i)  $18^\circ$  (a-ii and b-ii)  $84^\circ$  (a-iii and b-iii)  $110^\circ$ .
